# Supplementary material for: Equivalent intraperitoneal doses of ibuprofen supplemented in drinking water or in diet: a behavioral and biochemical assay using antinociceptive and thromboxane inhibitory dose–response curves in mice
Source: PeerJ. 2016 Jul 19;4:e2239. doi: 10.7717/peerj.2239 (PMC4958011; doi:10.7717/peerj.2239)
Supplement: Supplemental Information 1 [file peerj-04-2239-s001.xlsx]

## Sheet: Formalin
time	1a	2a	3a	4a	5a	6a	7a	8a	1b	2b	3b	4b	5b	6b	1c	2c	3c	4c	c5	c6	1d	2d	3d	4d	5d	6d	1e	2e	3e	4e	5e	6e	1f	2f	3f	4f	5f	6f	1b	2b	3b	4b	5b	6b	1c	2c	3c	4c	5c
	Saline										Ibu 100 mg/kg					50 mg/kg IBU							200 mg/kg IBU						75 mg/kg IBU					0.2 mg/ml IBU in drinking water						0.35 mg/ml IBU in drinking water						0.6 mg/ml IBU in drinking water
Flinshes
1	35	38	34	30	37	40	36	42	33	28	26	38	30	32	38	36	34	42	33	42	27	20	36	28	29	29	37	38	35	43	39	30	32	38	32	26	20	35	37	23	26	32	28	25	27	29	26	20	24
2	39	38	14	27	30	22	28	42	13	24	3	32	25	30	33	20	28	0	23	38	32	25	23	10	3	16	28	28	19	25	32	10	26	35	9	35	19	13	23	6	0	17	25	8	24	17	23	27	14
3	27	37	1	11	15	13	27	40	0	5	2	26	21	3	19	20	7	18	21	29	9	15	12	14	4	1	7	25	12	22	25	4	16	2	26	32	15	14	20	7	0	16	25	10	6	21	25	7	6
4	25	17	2	3	10	5	23	23	1	8	5	18	1	2	7	11	5	0	7	5	8	0	15	2	6	0	3	10	19	15	14	0	8	0	16	12	0	4	9	9	3	13	22	18	13	27	20	11	8
5	7	22	5	5	11	7	9	6	0	0	2	12	8	1	8	3	3	0	9	2	4	0	7	2	0	0	1	10	18	16	10	17	4	0	3	5	3	0	6	6	0	7	8	5	5	10	5	3	4
6	10	17	8	4	6	0	7	21	0	0	7	8	1	0	20	1	0	9	4	2	3	0	4	0	0	0	2	11	8	16	10	8	5	1	3	7	6	1	6	8	2	3	6	0	6	4	7	0	8
7	19	11	5	0	6	7	6	24	0	3	3	6	1	2	10	0	2	0	2	5	3	0	5	0	0	2	3	3	9	20	12	3	5	3	6	3	3	1	4	6	2	5	5	7	3	3	4	2	5
8	9	5	0	0	3	20	5	40	0	2	2	1	0	0	14	1	7	7	1	7	3	0	10	2	3	6	2	4	2	17	11	4	3	3	2	2	1	2	5	4	0	6	5	7	4	3	5	1	4
9	5	8	5	1	5	11	4	20	0	3	2	7	9	3	9	8	5	13	0	5	10	1	0	0	0	4	1	1	4	6	10	2	4	4	3	6	4	0	5	1	0	6	8	6	1	4	7	0	3
10	4	8	6	2	3	5	1	14	1	4	1	7	0	2	4	4	5	14	2	3	5	0	2	0	0	6	1	1	4	7	7	4	9	5	5	7	3	1	3	7	1	7	5	2	1	1	5	2	1
11	5	10	4	0	0	6	3	16	2	6	2	8	1	4	6	7	11	10	1	2	9	2	0	0	0	2	4	5	3	3	5	3	3	5	8	9	5	8	0	3	0	4	3	0	1	2	2	5	4
12	4	7	5	0	1	1	2	15	2	3	0	2	3	4	3	4	3	5	0	3	3	1	0	1	6	3	5	4	2	5	2	0	0	2	9	1	4	0	5	5	2	4	2	2	2	4	3	3	2
13	3	8	3	2	3	3	3	10	0	3	0	7	1	6	8	3	6	18	4	1	8	0	1	1	2	3	0	11	1	2	8	0	0	7	6	2	3	5	1	6	0	5	3	5	2	1	2	4	2
14	2	8	5	1	2	5	1	17	5	3	3	2	2	0	9	8	7	8	3	3	4	0	1	0	0	5	4	11	2	1	5	0	4	4	5	0	7	5	9	11	2	3	2	6	0	3	1	8	0
15	4	4	4	6	3	6	2	12	1	3	3	4	2	2	5	10	11	15	0	7	9	0	1	0	0	6	2	12	3	1	5	1	3	7	2	4	7	5	7	7	1	6	2	4	6	4	2	8	2
16	3	5	2	13	3	4	7	12	3	2	2	4	8	1	5	7	5	16	0	0	6	0	0	0	5	12	5	13	2	3	6	2	2	4	6	0	10	4	12	5	5	4	2	3	3	4	2	6	3
17	8	5	1	14	3	10	10	8	5	3	1	4	2	0	4	9	6	5	0	2	6	0	5	0	2	5	2	5	0	0	5	3	0	5	3	5	9	1	11	7	6	3	0	3	2	3	4	9	2
18	3	5	2	15	0	2	9	0	4	2	2	4	1	0	6	5	6	12	4	1	2	1	2	0	8	14	2	3	1	3	2	3	1	5	3	0	7	9	9	3	1	2	0	5	0	3	2	7	1
19	10	3	5	18	0	1	13	8	5	0	4	8	3	1	6	5	8	8	3	0	2	0	0	0	2	11	0	5	0	3	4	0	2	3	3	0	9	9	10	4	4	0	1	6	1	3	1	8	6
20	4	6	4	10	7	2	10	15	3	0	1	8	5	0	6	3	7	11	2	7	0	0	3	0	4	3	6	4	2	0	8	6	2	8	5	3	4	8	8	6	1	2	0	6	1	5	2	5	5
21	9	3	5	2	8	4	12	13	3	0	1	6	5	0	4	0	3	14	5	1	0	1	4	0	0	2	8	2	2	4	2	4	1	6	3	3	4	10	6	3	4	2	0	6	6	5	0	3	5
22	3	5	10	7	7	1	6	23	4	1	4	0	3	0	12	7	7	11	7	0	1	1	2	0	7	5	7	3	0	3	2	5	1	9	1	7	5	4	4	8	8	3	1	5	5	4	1	4	0
23	9	10	3	4	1	3	2	12	1	1	0	0	1	0	13	5	7	9	8	2	4	1	3	0	2	2	5	7	1	4	2	0	0	5	1	3	4	5	3	1	7	1	1	4	5	2	1	7	1
24	7	16	2	5	2	4	14	20	3	2	2	4	4	0	5	9	7	10	2	4	2	4	2	0	0	2	8	3	0	2	2	0	4	6	0	5	1	4	8	9	6	4	2	4	5	0	0	8	6
25	10	6	2	3	11	4	8	9	4	1	2	1	5	1	4	1	5	16	7	9	2	0	0	1	2	1	5	0	1	2	5	0	3	4	3	2	5	2	7	11	4	4	3	3	5	4	2	5	1
26	5	7	3	11	8	1	5	20	2	1	1	3	5	1	4	2	5	12	8	15	1	0	0	0	5	3	4	0	3	5	8	3	0	7	5	4	7	14	5	6	4	6	0	7	7	4	0	1	4
27	16	10	1	11	14	2	6	24	3	2	1	2	5	0	8	8	3	9	5	17	5	0	2		6	3	4	0	1	3	12	2	3	10	1	2	7	5	9	3	5	3	1	6	1	6	3	5	3
28	14	7	1	9	7	4	3	16	4	2	0	1	3	2	5	7	1	13	7	13	1	1	0	0	5	0	6	0	1	2	6	5	3	12	3	3	4	9	6	8	1	0	0	7	0	4	1	7	5
29	9	7	4	7	2	2	16	20	4	1	2	0	4	1	2	8	0	12	11	9	1	0	1	4	4	1	7	10	6	3	1	8	5	15	2	2	4	5	5	4	0	4	1	2	4	7	2	3	2
30	14	20	2	7	8	4	10	9	2	0	2	3	2	2	6	16	4	11	15	5	1	1	7	2	0	0	4	8	2	6	1	7	8	8	7	0	5	7	3	5	0	4	1	3	5	5	1	7	4
31	2	9	2	2	10	0	12	12	7	0	1	5	4	2	10	8	1	15	16	11	3	0	7	0	0	0	7	15	6	3	3	4	5	15	8	6	3	5	4	6	2	6	1	4	3	3	0	5	0
32	8	8	1	2	21	0	12	17	4	0	0	8	3	5	0	7	10	12	9	8	0	5	4	0	7	2	2	15	5	6	8	2	2	10	7	6	4	9	8	4	5	3	2	5	4	8	4	3	4
33	11	8	1	13	1	1	9	16	3	0	0	2	6	1	1	5	2	8	12	18	1	4	2	0	5	0	4	12	3	3	10	5	3	11	4	2	5	9	8	11	4	4	1	2	3	3	1	11	2
34	6	9	7	12	4	4	8	16	6	1	1	2	3	2	0	8	3	11	10	11	3	5	6	0	0	0	1	8	4	4	8	7	5	9	3	4	3	4	6	7	5	3	1	2	5	4	2	8	1
35	9	14	5	0	9	4	0	11	2	1	1	2	2	1	7	6	9	21	7	13	6	11	10	0	0	2	5	6	1	9	6	7	7	13	4	7	3	9	7	7	2	3	6	1	5	5	1	4	0
36	14	21	4	5	6	4	9	11	2	1	1	3	2	8	4	9	8	20	3	9	0	5	6	0	6	1	4	12	1	11	7	2	4	13	1	1	3	5	5	2	5	4	3	3	4	4	0	7	3
37	9	8	9	4	5	2	11	10	2	4	0	2	1	3	15	5	3	16	9	6	3	1	3	4	4	0	2	11	3	13	6	11	5	8	5	7	3	5	3	2	1	6	1	4	4	4	1	9	3
38	14	12	8	8	7	3	7	14	5	2	2	1	5	7	12	7	5	10	12	7	2	2	2	0	5	2	1	3	3	8	8	5	11	9	4	4	2	6	6	7	4	5	3	0	1	6	2	4	6
39	13	18	4	2	13	1	9	12	4	1	1	1	2	4	9	6	8	3	7	5	0	5	11	4	4	0	5	4	2	5	3	7	8	12	3	3	3	3	6	5	0	6	1	2	5	7	2	1	4
40	10	3	7	14	15	4	7	12	1	5	0	4	3	3	6	5	4	4	4	7	0	5	5	2	8	0	8	2	0	4	5	4	5	8	9	5	2	2	12	2	3	4	2	0	4	9	4	4	4
41	7	7	6	9	12	2	5	8	0	0	0	4	1	2	9	5	6	12	12	3	1	0	9	0	5	1	9	1	4	8	5	3	6	8	8	13	3	0	2	6	3	6	1	0	4	6	4	4	0
42	5	5	8	5	11	0	9	20	1	1	1	4	5	1	12	4	2	13	12	1	2	17	10	1	2	0	4	9	4	3	7	5	3	15	9	11	5	8	7	2	4	2	3	8	6	6	3	4	0
43	9	10	4	3	12	3	6	14	4	1	4	4	3	0	15	8	7	6	13	3	2	5	3	0	4	0	3	5	4	0	7	10	3	9	4	4	2	8	8	11	3	2	5	4	4	5	2	4	3
44	8	10	3	3	3	1	7	12	3	1	5	0	5	0	21	8	14	3	8	4	3	3	4	2	3	0	3	3	3	1	9	7	1	8	5	3	3	3	0	7	2	6	7	0	3	6	6	4	1
45	7	16	2	0	5	6	19	12	6	2	0	1	2	6	11	4	0	7	7	9	3	1	6	2	9	3	4	2	3	10	6	7	1	9	4	0	2	6	2	2	3	2	3	2	2	4	2	6	2
46	7	7	5	11	7	2	1	10	2	4	0	0	3	14	7	5	13	7	4	5	5	1	4	3	3	0	2	6	3	15	8	14	11	14	6	2	3	6	9	6	4	2	2	0	2	2	3	1	1
47	1	0	7	12	8	0	5	21	5	6	0	0	2	4	9	5	10	16	5	4	4	2	7	6	5	4	6	10	11	13	8	10	8	8	4	3	5	5	5	7	0	4	5	4	5	6	0	4	5
48	11	5	1	5	8	2	4	12	0	6	0	0	3	8	10	6	4	11	4	10	5	3	2	1	4	3	2	7	6	9	2	8	9	9	5	5	5	6	4	2	2	6	8	4	4	6	0	3	4
49	5	3	4	9	5	8	4	16	0	4	1	0	2	2	8	3	8	16	1	3	3	2	3	4	4	0	7	8	8	10	1	11	7	3	6	4	3	2	7	7	5	2	7	5	6	7	0	4	3
50	6	9	1	3	4	5	4	12	2	4	1	0	1	3	14	3	8	21	0	7	2	1	4	4	3	2	9	9	9	14	3	6	10	13	4	8	0	5	1	4	4	2	1	5	1	6	0	5	4
51	6	13	3	0	5	3	4	16	6	7	1	2	6	3	9	3	6	16	7	2	3	10	5	4	6	6	4	7	9	19	2	7	5	10	6	5	0	3	0	3	3	5	4	5	4	4	3	1	3
52	7	18	3	0	2	7	0	8	2	4	2	3	4	2	9	3	8	13	2	10	2	10	8	10	8	2	5	7	5	8	15	4	4	10	5	4	1	3	1	5	3	5	3	4	0	5	2	4	1
53	4	3	2	3	5	4	3	10	2	2	0	0	4	1	8	2	6	3	1	13	3	17	4	9	6	3	4	6	6	12	3	7	10	11	5	5	1	6	5	0	1	6	3	5	3	4	3	3	2
54	9	0	0	2	6	4	6	5	4	1	0	0	1	6	9	4	11	6	6	7	3	12	3	13	4	7	5	7	7	13	5	8	5	11	4	7	1	6	4	0	2	3	4	6	1	4	3	8	3
55	8	4	3	3	3	7	5	9	4	3	1	0	2	6	10	6	13	9	2	10	5	13	3	5	7	2	5	11	6	14	4	5	8	6	8	4	3	3	3	4	2	4	5	0	6	5	5	5	0
56	6	7	1	0	6	7	1	12	1	4	0	2	5	9	7	3	14	10	0	4	6	10	2	8	4	4	6	9	3	10	8	6	7	7	6	4	7	4	1	3	4	4	3	1	1	8	3	4	1
57	8	6	4	0	10	5	4	14	0	5	3	3	3	4	3	1	7	7	5	3	3	2	0	10	6	4	7	5	2	12	4	5	9	10	8	0	4	1	3	5	1	3	2	0	5	6	1	5	2
58	6	3	1	2	13	4	4	16	0	3	0	2	5	4	9	1	10	7	5	6	3	2	0	6	2	5	8	5	0	12	4	6	6	8	8	2	2	2	1	5	2	5	5	3	1	4	3	3	6
59	8	5	1	1	7	2	4	17	1	0	2	3	3	0	7	4	6	13	7	4	0	1	5	10	3	4	8	1	4	3	3	8	4	9	7	4	3	5	2	3	0	4	3	4	1	5	2	5	3
60	5	2	1	2	8	5	0	10	0	0	3	0	5	6	4	2	9	11	4	5	1	1	4	7	5	8	5	5	3	13	6	6	8	8	11	10	4	3	0	3	0	1	6	4	2	3	6	4	4
licking and biting	1a	2a	3a	4a	5a	6a	7a	8a	1b	2b	3b	4b	5b	6b	7b	8b	3b	4b	5b	c6	2b	3b	4b	5b	6b	1b	1e	2e	3e	4e	5e	6e	1f	2f	3f	4f	5f	6f	1b	2b	3b	4b	5b	6b	1c	2c	3c	4c	5c
1	60	60	60	60	60	60	60	60	40	40	30	60	50	60	60	60	50	50	45	50	60	20	50	40	50	30	60	60	50	60	60	40	60	30	50	60	35	50	60	40	40	50	60	30	40	60	40	60	60
2	60	60	50	55	60	60	30	60	20	5	0	60	10	40	50	40	40	0	40	60	60	0	30	0	0	0	20	60	20	60	60	60	30	10	60	40	0	45	30	40	0	60	60	15	40	45	0	40	30
3	60	60	0	60	60	30	10	45	0	0	0	60	0	0	50	0	0	0	5	30	15	0	20	0	0	0	0	40	0	50	50	0	0	0	30	60	0	30	10	60	0	40	45	0	50	60	0	5	60
4	60	50	0	0	60	0	25	30	0	0	0	60	0	0	60	0	0	0	0	0	0	0	20	0	0	0	0	30	0	50	20	0	0	0	5	40	0	0	0	45	0	10	10	0	30	60	0	0	40
5	60	10	0	0	55	0	30	0	0	0	0	60	0	0	60	0	0	0	0	0	0	0	0	0	0	0	0	20	0	30	0	40	0	0	0	0	0	0	0	0	0	10	0	0	60	60	0	0	10
6	60	30	10	0	60	0	15	0	0	0	0	50	0	0	45	0	0	0	0	0	0	0	0	0	0	0	0	10	0	50	0	40	0	0	0	0	0	0	5	10	0	5	5	0	15	60	0	0	0
7	55	60	20	0	60	60	20	20	0	0	0	60	0	0	55	0	15	0	0	0	0	0	0	0	0	0	0	0	5	40	0	60	0	0	0	0	0	0	0	0	0	0	10	0	30	40	0	0	25
8	0	60	50	0	60	60	0	10	0	0	0	60	0	0	50	0	10	0	0	0	0	0	5	0	0	0	0	0	5	50	0	30	0	0	0	0	0	0	0	0	0	0	5	0	45	10	5	0	0
9	0	60	60	0	60	60	0	10	0	0	5	60	0	0	30	0	20	0	0	0	0	0	0	0	0	0	0	0	10	30	0	40	0	0	0	0	0	0	0	0	0	0	25	5	0	0	0	0	5
10	0	60	35	0	10	60	0	15	0	0	5	60	0	0	5	0	10	0	0	0	0	0	0	0	0	0	0	0	20	30	0	50	0	0	0	0	0	0	0	0	0	0	20	15	0	0	0	0	20
11	5	60	50	0	0	60	0	10	0	0	0	60	0	0	0	0	0	0	0	0	0	0	0	0	0	0	0	0	30	40	0	10	0	0	0	0	0	0	0	0	0	10	50	0	0	0	10	0	0
12	0	50	20	0	0	50	0	0	0	0	0	60	0	0	0	0	0	0	0	0	0	0	0	0	0	0	0	0	15	10	0	0	0	0	0	0	0	0	5	0	0	0	45	0	0	0	10	0	0
13	5	60	10	0	0	40	0	0	0	0	0	60	0	0	0	0	0	0	0	0	0	0	0	0	0	0	0	0	35	10	0	0	0	0	0	0	0	0	0	0	0	0	0	0	10	0	0	0	0
14	0	20	5	0	25	50	0	0	0	0	0	60	0	0	0	0	0	0	0	0	0	0	5	0	0	0	0	20	5	5	0	0	0	0	0	0	0	0	0	0	0	15	10	0	50	0	20	5	0
15	5	30	5	0	40	40	0	0	0	0	0	60	0	0	0	0	0	0	0	0	10	0	0	0	0	0	0	10	0	20	0	40	0	0	0	0	0	0	0	0	0	10	20	10	0	0	10	0	0
16	0	30	5	0	0	30	0	10	0	0	0	50	0	0	0	0	0	0	0	0	25	0	0	0	0	0	0	5	0	0	0	20	5	0	0	0	0	0	10	0	0	10	10	5	0	0	0	0	10
17	5	20	5	0	10	20	10	0	0	0	0	30	0	0	0	0	0	0	0	0	0	0	5	0	0	0	0	0	0	0	0	35	15	0	0	5	0	0	10	10	0	5	0	0	30	5	0	0	5
18	30	0	5	45	0	20	5	0	0	0	0	40	0	0	0	0	0	0	0	0	0	0	0	0	5	30	0	0	0	0	0	30	0	0	0	0	0	0	0	25	0	10	0	5	50	10	0	0	0
19	10	0	0	40	0	0	0	20	0	0	5	20	0	0	0	0	10	0	0	0	0	0	0	0	0	60	0	0	0	0	0	30	5	0	0	0	0	0	10	30	0	15	0	5	30	5	20	10	0
20	0	0	0	30	0	0	30	10	0	0	0	20	0	0	0	0	0	0	0	0	0	0	25	0	0	60	0	0	0	0	10	30	20	0	0	0	0	5	5	20	0	20	15	25	20	0	35	15	15
21	10	10	15	60	0	0	30	0	0	0	0	0	0	0	0	0	5	0	0	0	0	0	10	0	0	30	0	0	0	0	30	15	5	0	25	0	5	0	15	30	0	5	20	0	0	0	25	10	5
22	30	15	10	60	0	0	20	10	0	0	0	0	0	0	0	10	0	0	0	0	0	0	0	0	0	20	0	0	0	0	30	20	0	0	20	0	20	0	15	20	0	35	25	0	0	0	0	0	0
23	35	0	0	60	0	35	0	30	0	0	0	0	0	0	0	0	0	0	0	0	0	0	5	0	0	0	0	20	0	5	20	0	0	5	15	0	10	5	5	40	0	5	10	0	0	0	10	0	0
24	45	5	10	50	0	45	15	30	0	0	0	5	0	0	0	10	5	0	0	0	0	0	0	0	0	0	5	10	0	0	20	0	0	0	25	5	5	20	0	10	5	10	0	0	0	40	45	0	5
25	50	0	5	45	0	30	15	30	0	0	0	0	0	0	0	30	15	0	10	0	0	0	0	0	0	0	0	0	0	0	0	0	10	0	0	10	0	10	5	0	10	10	0	0	5	5	10	15	20
26	50	30	10	40	0	20	0	15	0	0	0	10	0	0	20	60	45	0	0	0	0	0	0	0	0	0	0	0	20	0	0	0	35	0	0	40	0	0	5	20	5	0	10	0	0	0	0	40	15
27	5	40	0	40	5	30	0	15	0	0	0	40	0	0	30	60	10	0	40	0	0	0	0	0	0	0	0	0	40	5	10	0	20	0	0	30	0	0	10	25	0	15	5	0	20	5	0	5	45
28	10	60	5	60	10	0	0	20	0	0	0	0	0	0	0	50	45	0	25	0	0	0	0	0	0	0	0	0	30	0	30	0	5	30	0	30	0	10	0	0	0	20	20	0	45	20	0	5	5
29	30	40	15	60	0	0	5	20	0	0	0	0	0	0	0	60	60	0	15	0	0	0	0	0	0	0	0	10	5	0	30	0	0	20	0	45	0	15	15	30	0	0	20	30	0	0	0	0	0
30	50	10	15	50	10	30	45	50	0	0	0	0	0	0	5	0	45	0	30	0	0	0	10	0	0	0	0	10	35	0	40	20	0	10	0	20	0	5	20	30	0	10	40	10	0	10	0	0	0
31	60	30	15	30	5	15	10	30	0	0	0	0	0	0	20	30	50	0	15	5	0	0	5	0	0	0	5	15	5	5	10	40	5	10	0	10	15	0	15	15	0	20	5	0	0	5	0	0	0
32	40	30	0	50	15	20	0	20	0	0	0	0	0	0	60	20	25	0	5	0	0	0	0	0	0	0	0	10	0	0	5	10	20	0	0	10	30	0	0	20	0	10	0	5	0	5	0	5	0
33	35	10	0	30	60	5	10	0	0	0	0	0	0	0	50	20	50	0	5	30	0	0	0	0	0	0	0	0	0	0	5	0	40	0	0	30	10	0	5	0	0	0	0	20	0	0	20	15	0
34	60	10	30	30	55	5	35	0	0	0	0	15	0	0	20	50	35	0	5	20	0	0	0	0	0	0	0	5	0	0	5	0	25	30	0	30	0	5	5	0	0	0	0	40	5	0	20	5	15
35	30	50	30	0	55	15	60	30	0	0	0	0	0	0	30	30	5	5	45	5	0	5	10	0	0	0	0	40	0	0	0	0	40	10	10	5	0	0	0	0	0	30	5	30	0	0	10	5	40
36	55	50	0	0	60	20	15	25	0	0	0	5	0	0	15	10	5	5	50	0	0	0	30	0	0	0	0	0	0	0	0	0	10	5	35	25	5	0	35	40	0	10	5	10	0	0	20	5	0
37	30	40	10	10	50	40	5	5	0	0	0	0	0	5	0	15	0	0	35	0	0	0	60	0	0	0	0	20	0	5	20	0	30	0	15	15	20	0	50	20	0	10	20	35	0	15	0	0	5
38	20	0	20	55	15	40	15	10	0	0	0	5	0	10	0	5	0	20	5	5	0	0	60	0	0	0	0	50	0	10	10	20	10	5	0	15	30	0	20	0	0	10	15	45	45	0	5	0	0
39	15	15	15	45	20	60	10	30	0	0	0	0	0	25	0	10	0	45	10	40	0	0	15	0	0	0	0	40	0	15	0	15	15	0	5	25	25	25	40	0	0	0	15	20	30	5	0	0	0
40	5	0	10	5	5	40	20	25	0	0	0	5	0	10	0	5	0	55	0	45	0	0	0	0	0	0	5	45	0	0	0	20	0	0	10	10	10	20	0	10	0	5	0	30	30	0	5	0	20
41	10	30	30	10	0	30	5	5	0	0	0	15	0	50	0	0	15	0	15	55	0	0	0	0	0	0	10	50	10	30	20	30	5	10	10	0	0	40	30	10	5	5	0	50	25	0	10	20	40
42	0	45	15	0	10	0	35	20	0	0	0	30	0	35	10	0	60	0	10	50	0	5	0	0	0	0	0	0	20	60	15	25	15	10	0	5	0	10	35	25	20	30	0	0	0	10	5	0	25
43	40	30	30	0	15	0	0	0	0	0	0	0	0	55	0	10	50	5	5	40	0	0	0	0	0	0	0	5	20	60	0	15	10	10	5	5	0	0	20	0	5		15	30	0	0	30	0	10
44	15	45	5	5	15	0	0	20	0	0	0	0	0	30	0	5	20	45	30	15	0	0	0	0	0	0	0	5	50	50	0	10	25	0	0	20	0	0	55	0	10	15	35	45	0	0	0	0	10
45	0	0	25	5	5	35	0	40	0	0	0	0	0	0	0	0	60	10	35	10	0	0	0	0	0	0	0	35	15	5	0	0	40	0	0	60	0	0	20	35	0	20	30	30	0	0	0	5	20
46	0	20	15	30	0	10	45	5	0	0	0	0	0	0	0	0	20	5	20	0	0	0	0	10	0	0	0	40	0	0	0	0	5	0	0	30	0	0	10	10	40	10	15	60	0	0	15	0	20
47	0	0	40	5	20	0	0	10	0	0	0	0	0	0	0	5	30	0	5	30	0	0	0	40	5	5	0	10	20	5	20	0	15	0	10	10	0	0	10	0	40	30	5	15	0	0	40	5	0
48	5	0	0	5	30	0	0	0	0	0	0	0	0	0	0	0	10	0	0	0	0	0	0	0	5	0	0	30	5	0	45	0	5	25	0	0	0	0	10	20	0	5	0	10	0	0	15	0	10
49	0	0	30	0	60	40	0	20	0	0	0	0	0	0	0	10	0	0	5	10	0	0	0	0	15	0	0	5	0	0	45	0	5	30	5	0	0	0	5	0	0	0	10	20	0	0	35	0	0
50	0	25	5	0	60	0	0	15	0	0	5	0	0	0	0	0	0	0	0	0	0	0	0	0	40	0	10	0	0	0	40	0	5	5	0	0	0	0	40	5	0	0	30	0	0	0	45	0	0
51	3	10	25	10	40	0	15	15	0	0	0	0	0	0	0	10	0	5	5	0	0	5	0	0	35	0	0	0	5	5	55	10	5	5	0	0	0	0	30	0	0	15	10	10	0	0	15	0	0
52	0	50	35	10	30	10	50	0	0	0	0	0	0	0	0	20	0	10	5	5	0	10	10	0	45	0	0	0	10	10	0	5	0	0	0	0	0	0	30	25	0	0	10	5	0	5	10	0	10
53	0	50	20	5	30	20	10	10	0	0	0	0	0	0	5	10	0	45	0	0	15	0	5	5	0	5	0	5	0	0	0	35	0	0	0	0	0	0	0	40	0	0	15	0	0	15	10	0	5
54	0	60	35	5	20	0	0	0	0	0	0	0	0	5	0	5	0	20	10	5	0	0	0	10	15	0	5	0	0	0	0	5	0	0	0	0	0	0	0	15	0	0	0	20	0	25	15	0	15
55	0	0	40	5	10	5	0	15	10	0	0	0	0	15	0	0	0	5	55	0	15	0	0	0	0	0	15	0	10	5	0	15	0	0	0	0	0	0	5	5	10	0	0	50	0	0	0	0	5
56	0	0	5	5	20	5	0	5	20	0	0	0	15	10	5	0	0	5	40	0	5	0	0	0	0	0	15	10	40	0	0	0	0	0	0	10	0	20	30	0	5	10	20	45	20	0	0	0	45
57	0	0	20	5	30	0	0	5	10	0	0	5	30	5	20	5	0	0	10	0	10	0	0	0	0	0	5	30	40	0	0	0	0	0	0	0	5	40	5	0	30	0	25	50	0	0	0	0	25
58	3	40	35	10	10	10	0	0	10	5	0	15	15	0	5	0	30	0	35	0	0	0	0	10	0	0	5	0	60	10	0	0	5	5	10	5	5	45	15	0	20	0	15	15	0	0	10	0	10
59	0	10	20	40	50	5	0	40	0	40	20	20	25	0	0	5	0	0	20	0	0	5	5	0	0	0	0	0	5	60	0	0	0	0	0	5	0	20	5	0	0	25	10	10	0	0	25	0	5
60	0	5	50	40	60	0	0	40	0	30	10	0	30	5	0	0	0	10	30	5	0	0	5	0	0	0	0	0	30	15	0	25	0	0	0	0	0	20	10	0	0	20	0	0	0	10	0	0	0
10
1	41	44	40	36	43	46	42	48	37	32	29	44	35	38	44	42	39	47	37.5	47	33	22	41	32	34	32	43	44	40	49	45	34	38	41	37	32	23.5	40	43	27	30	37	34	28	31	35	30	26	30
2	45	44	19	32.5	36	28	31	48	15	24.5	3	38	26	34	38	24	32	0	27	44	38	25	26	10	3	16	30	34	21	31	38	16	29	36	15	39	19	17.5	26	10	0	23	31	9.5	28	21.5	23	31	17
3	33	43	1	17	21	16	28	44.5	0	5	2	32	21	3	24	20	7	18	21.5	32	10.5	15	14	14	4	1	7	29	12	27	30	4	16	2	29	38	15	17	21	13	0	20	29.5	10	11	27	25	7.5	12
4	31	22	2	3	16	5	25.5	26	1	8	5	24	1	2	13	11	5	0	7	5	8	0	17	2	6	0	3	13	19	20	16	0	8	0	16.5	16	0	4	9	13.5	3	14	23	18	16	33	20	11	12
5	13	23	5	5	16.5	7	12	6	0	0	2	18	8	1	14	3	3	0	9	2	4	0	7	2	0	0	1	12	18	19	10	21	4	0	3	5	3	0	6	6	0	8	8	5	11	16	5	3	5
6	16	20	9	4	12	0	8.5	21	0	0	7	13	1	0	24.5	1	0	9	4	2	3	0	4	0	0	0	2	12	8	21	10	12	5	1	3	7	6	1	6.5	9	2	3.5	6.5	0	7.5	10	7	0	8
7	24.5	17	7	0	12	13	8	26	0	3	3	12	1	2	15.5	0	3.5	0	2	5	3	0	5	0	0	2	3	3	9.5	24	12	9	5	3	6	3	3	1	4	6	2	5	6	7	6	7	4	2	7.5
8	9	11	5	0	9	26	5	41	0	2	2	7	0	0	19	1	8	7	1	7	3	0	10.5	2	3	6	2	4	2.5	22	11	7	3	3	2	2	1	2	5	4	0	6	5.5	7	8.5	4	5.5	1	4
9	5	14	11	1	11	17	4	21	0	3	2.5	13	9	3	12	8	7	13	0	5	10	1	0	0	0	4	1	1	5	9	10	6	4	4	3	6	4	0	5	1	0	6	10.5	6.5	1	4	7	0	3.5
10	4	14	9.5	2	4	11	1	15.5	1	4	1.5	13	0	2	4.5	4	6	14	2	3	5	0	2	0	0	6	1	1	6	10	7	9	9	5	5	7	3	1	3	7	1	7	7	3.5	1	1	5	2	3
11	5.5	16	9	0	0	12	3	17	2	6	2	14	1	4	6	7	11	10	1	2	9	2	0	0	0	2	4	5	6	7	5	4	3	5	8	9	5	8	0	3	0	5	8	0	1	2	3	5	4
12	4	12	7	0	1	6	2	15	2	3	0	8	3	4	3	4	3	5	0	3	3	1	0	1	6	3	5	4	3.5	6	2	0	0	2	9	1	4	0	5.5	5	2	4	6.5	2	2	4	4	3	2
13	3.5	14	4	2	3	7	3	10	0	3	0	13	1	6	8	3	6	18	4	1	8	0	1	1	2	3	0	11	4.5	3	8	0	0	7	6	2	3	5	1	6	0	5	3	5	3	1	2	4	2
14	2	10	5.5	1	4.5	10	1	17	5	3	3	8	2	0	9	8	7	8	3	3	4	0	1.5	0	0	5	4	13	2.5	1.5	5	0	4	4	5	0	7	5	9	11	2	4.5	3	6	5	3	3	8.5	0
15	4.5	7	4.5	6	7	10	2	12	1	3	3	10	2	2	5	10	11	15	0	7	10	0	1	0	0	6	2	13	3	3	5	5	3	7	2	4	7	5	7	7	1	7	4	5	6	4	3	8	2
16	3	8	2.5	13	3	7	7	13	3	2	2	9	8	1	5	7	5	16	0	0	8.5	0	0	0	5	12	5	13.5	2	3	6	4	2.5	4	6	0	10	4	13	5	5	5	3	3.5	3	4	2	6	4
17	8.5	7	1.5	14	4	12	11	8	5	3	1	7	2	0	4	9	6	5	0	2	6	0	5.5	0	2	5	2	5	0	0	5	6.5	1.5	5	3	5.5	9	1	12	8	6	3.5	0	3	5	3.5	4	9	2.5
18	6	5	2.5	19.5	0	4	9.5	0	4	2	2	8	1	0	6	5	6	12	4	1	2	1	2	0	8.5	17	2	3	1	3	2	6	1	5	3	0	7	9	9	5.5	1	3	0	5.5	5	4	2	7	1
19	11	3	5	22	0	1	13	10	5	0	4.5	10	3	1	6	5	9	8	3	0	2	0	0	0	2	17	0	5	0	3	4	3	2.5	3	3	0	9	9	11	7	4	1.5	1	6.5	4	3.5	3	9	6
20	4	6	4	13	7	2	13	16	3	0	1	10	5	0	6	3	7	11	2	7	0	0	5.5	0	4	9	6	4	2	0	9	9	4	8	5	3	4	8.5	8.5	8	1	4	1.5	8.5	3	5	5.5	6.5	6.5
21	10	4	6.5	8	8	4	15	13	3	0	1	6	5	0	4	0	3.5	14	5	1	0	1	5	0	0	5	8	2	2	4	5	5.5	1.5	6	5.5	3	4.5	10	7.5	6	4	2.5	2	6	6	5	2.5	4	5.5
22	6	6.5	11	13	7	1	8	24	4	1	4	0	3	0	12	8	7	11	7	0	1	1	2	0	7	7	7	3	0	3	5	7	1	9	3	7	7	4	5.5	10	8	6.5	3.5	5	5	4	1	4	0
23	12.5	10	3	10	1	6.5	2	15	1	1	0	0	1	0	13	5	7	9	8	2	4	1	3.5	0	2	2	5	9	1	4.5	4	0	0	5.5	2.5	3	5	5.5	3.5	5	7	1.5	2	4	5	2	2	7	1
24	11.5	16.5	3	10	2	8.5	15.5	23	3	2	2	4.5	4	0	5	10	7.5	10	2	4	2	4	2	0	0	2	8.5	4	0	2	4	0	4	6	2.5	5.5	1.5	6	8	10	6.5	5	2	4	5	4	4.5	8	6.5
25	15	6	2.5	7.5	11	7	9.5	12	4	1	2	1	5	1	4	4	6.5	16	8	9	2	0	0	1	2	1	5	0	1	2	5	0	4	4	3	3	5	3	7.5	11	5	5	3	3	5.5	4.5	3	6.5	3
26	10	10	4	15	8	3	5	21.5	2	1	1	4	5	1	6	8	9.5	12	8	15	1	0	0	0	5	3	4	0	5	5	8	3	3.5	7	5	8	7	14	5.5	8	4.5	6	1	7	7	4	0	5	5.5
27	16.5	14	1	15	14.5	5	6	25.5	3	2	1	6	5	0	11	14	4	9	9	17	5	0	2	0	6	3	4	0	5	3.5	13	2	5	10	1	5	7	5	10	5.5	5	4.5	1.5	6	3	6.5	3	5.5	7.5
28	15	13	1.5	15	8	4	3	18	4	2	0	1	3	2	5	12	5.5	13	9.5	13	1	1	0	0	5	0	6	0	4	2	9	5	3.5	15	3	6	4	10	6	8	1	2	2	7	4.5	6	1	7.5	5.5
29	12	11	5.5	13	2	2	16.5	22	4	1	2	0	4	1	2	14	6	12	12.5	9	1	0	1	4	4	1	7	11	6.5	3	4	8	5	17	2	6.5	4	6.5	6.5	7	0	4	3	5	4	7	2	3	2
30	19	21	3.5	12	9	7	14.5	14	2	0	2	3	2	2	6.5	16	8.5	11	18	5	1	1	8	2	0	0	4	9	5.5	6	5	9	8	9	7	2	5	7.5	5	8	0	5	5	4	5	6	1	7	4
31	8	12	3.5	5	10.5	1.5	13	15	7	0	1	5	4	2	12	11	6	15	17.5	11.5	3	0	7.5	0	0	0	7.5	16.5	6.5	3.5	4	8	5.5	16	8	7	4.5	5	5.5	7.5	2	8	1.5	4	3	3.5	0	5	0
32	12	11	1	7	22.5	2	12	19	4	0	0	8	3	5	6	9	12.5	12	9.5	8	0	5	4	0	7	2	2	16	5	6	8.5	3	4	10	7	7	7	9	8	6	5	4	2	5.5	4	8.5	4	3.5	4
33	14.5	9	1	16	7	1.5	10	16	3	0	0	2	6	1	6	7	7	8	12.5	21	1	4	2	0	5	0	4	12	3	3	10.5	5	7	11	4	5	6	9	8.5	11	4	4	1	4	3	3	3	12.5	2
34	12	10	10	15	9.5	4.5	11.5	16	6	1	1	3.5	3	2	2	13	6.5	11	10.5	13	3	5	6	0	0	0	1	8.5	4	4	8.5	7	7.5	12	3	7	3	4.5	6.5	7	5	3	1	6	5.5	4	4	8.5	2.5
35	12	19	8	0	14.5	5.5	6	14	2	1	1	2	2	1	10	9	9.5	21.5	11.5	13.5	6	11.5	11	0	0	2	5	10	1	9	6	7	11	14	5	7.5	3	9	7	7	2	6	6.5	4	5	5	2	4.5	4
36	19.5	26	4	5	12	6	10.5	13.5	2	1	1	3.5	2	8	5.5	10	8.5	20.5	8	9	0	5	9	0	6	1	4	12	1	11	7	2	5	13.5	4.5	3.5	3.5	5	8.5	6	5	5	3.5	4	4	4	2	7.5	3
37	12	12	10	5	10	6	11.5	10.5	2	4	0	2	1	3.5	15	6.5	3	16	12.5	6	3	1	9	4	4	0	2	13	3	13.5	8	11	8	8	6.5	8.5	5	5	8	4	1	7	3	7.5	4	5.5	1	9	3.5
38	16	12	10	13.5	8.5	7	8.5	15	5	2	2	1.5	5	8	12	7.5	5	12	12.5	7.5	2	2	8	0	5	2	1	8	3	9	9	7	12	9.5	4	5.5	5	6	8	7	4	6	4.5	4.5	5.5	6	2.5	4	6
39	14.5	19.5	5.5	6.5	15	7	10	15	4	1	1	1	2	6.5	9	7	8	7.5	8	9	0	5	12.5	4	4	0	5	8		6.5	3	8.5	9.5	12	3.5	5.5	5.5	5.5	10	5	0	6	2.5	4	8	7.5	2	1	4
40	10.5	3	8	14.5	15.5	8	9	14.5	1	5	0	4.5	3	4	6	5.5	4	9.5	4	11.5	0	5	5	2	8	0	8.5	6.5	0	4	5	6	5	8	10	6	3	4	12	3	3	4.5	2	3	7	9	4.5	4	6
41	8	10	9	10	12	5	5.5	8.5	0	0	0	5.5	1	7	9	5	7.5	12	13.5	8.5	1	0	9	0	5	1	10	6	5	11	7	6	6.5	9	9	13	3	4	5	7	3.5	6.5	1	5	6.5	6	5	6	4
42	5	9.5	9.5	5	12	0	12.5	22	1	1	1	7	5	4.5	13	4	8	13	13	6	2	17.5	10	1	2	0	4	9	6	9	8.5	7.5	4.5	16	9	11.5	5	9	10.5	4.5	6	5	3	8	6	7	3.5	4	2.5
43	13	13	7	3	13.5	3	6	14	4	1	4	4	3	5.5	15	9	12	6.5	13.5	7	2	5	3	0	4	0	3	5.5	6	6	7	11.5	4	10	4.5	4.5	2	8	10	11	3.5	2	6.5	7	4	5	5	4	4
44	9.5	14.5	3.5	3.5	4.5	1	7	14	3	1	5	0	5	3	21	8.5	16	7.5	11	5.5	3	3	4	2	3	0	3	3.5	8	6	9	8	3.5	8	5	5	3	3	5.5	7	3	7.5	10.5	4.5	3	6	6	4	2
45	7	16	4.5	0.5	5.5	9.5	19	16	6	2	0	1	2	6	11	4	6	8	10.5	10	3	1	6	2	9	3	4	5.5	4.5	10.5	6	7	5	9	4	6	2	6	4	5.5	3	4	6	5	2	4	2	6.5	4
46	7	9	6.5	14	7	3	5.5	10.5	2	4	0	0	3	14	7	5	15	7.5	6	5	5	1	4	4	3	0	2	10	3	15	8	14	11.5	14	6	5	3	6	10	7	8	3	3.5	6	2	2	4.5	1	3
47	1	0	11	12.5	10	0	5	22	5	6	0	0	2	4	9	5.5	13	16	5.5	7	4	2	7	10	5.5	4.5	6	11	13	13.5	10	10	9.5	8	5	4	5	5	6	7	4	7	5.5	5.5	5	6	4	4.5	5
48	11.5	5	1	5.5	11	2	4	12	0	6	0	0	3	8	10	6	5	11	4	10	5	3	2	1	4.5	3	2	10	6.5	9	6.5	8	9.5	11.5	5	5	5	6	5	4	2	6.5	8	5	4	6	1.5	3	5
49	5	3	7	9	11	12	4	18	0	4	1	0	2	2	8	4	8	16	1.5	4	3	2	3	4	5.5	0	7	8.5	8	10	5.5	11	7.5	6	6.5	4	3	2	7.5	7	5	2	8	7	6	7	3.5	4	3
50	6	11.5	1.5	3	10	5	4	13.5	2	4	1.5	0	1	3	14	3	8	21	0	7	2	1	4	4	7	2	10	9	9	14	7	6	10.5	13.5	4	8	0	5	5	4.5	4	2	4	5	1	6	4.5	5	4
51	6.3	14	5.5	1	9	3	5.5	17.5	6	7	1	2	6	3	9	4	6	16.5	7.5	2	3	10.5	5	4	9.5	6	4	7	9.5	19.5	7.5	8	5.5	10.5	6	5	0	3	3	3	3	6.5	5	6	4	4	4.5	1	3
52	7	23	6.5	1	5	8	5	8	2	4	2	3	4	2	9	5	8	14	2.5	10.5	2	11	9	10	12.5	2	5	7	6	9	15	4.5	4	10	5	4	1	3	4	7.5	3	5	4	4.5	0	5.5	3	4	2
53	4	8	4	3.5	8	6	4	11	2	2	0	0	4	1	8.5	3	6	7.5	1	13	4.5	7	4.5	9.5	6	3.5	4	6.5	6	12	3	10.5	10	11	5	5	1	6	5	4	1	6	4.5	5	3	5.5	4	3	2.5
54	9	6	3.5	2.5	8	4	6	5	4	1	0	0	1	6.5	9	4.5	11	8	7	7.5	3	12	3	14	5.5	7	5.5	7	7	13	5	8.5	5	11	4	7	1	6	4	1.5	2	3	4	8	1	6.5	4.5	8	4.5
55	8	4	7	3.5	4	7.5	5	10.5	5	3	1	0	2	7.5	10	6	13	9.5	7.5	10	6.5	11	3	5	7	2	6.5	11	7	14.5	4	6.5	8	6	8	4	3	3	3.5	4.5	3	4	5	5	6	5	5	5	0.5
56	6	7	1.5	0.5	8	7.5	1	12.5	3	4	0	2	6.5	10	7.5	3	14	10.5	4	4	6.5	10	2	8	4	4	7.5	10	7	10	8	6	7	7	6	5	7	6	4	3	4.5	5	5	5.5	3	8	3	4	5.5
57	8	6	6	0.5	13	5	4	14.5	1	5	3	3.5	6	4.5	5	1.5	7	7	6	3	4	2	0	10	6	4	7.5	8	6	12	4	5	9	10	8	0	4.5	5	3.5	5	4	3	4.5	5	5	6	1	5	4.5
58	6.3	7	4.5	3	14	5	4	16	1	3.5	0	3.5	6.5	4	9.5	1	13	7	8.5	6	3	2	0	7	2	5	8.5	5	6	13	4	6	6.5	8.5	9	2.5	2.5	6.5	2.5	5	4	5	6.5	4.5	1	4	4	3	7
59	8	6	3	5	12	2.5	4	21	1	4	4	5	5.5	0	7	4.5	6	13	9	4	0	1.5	5.5	10	3	4	8	1	4.5	9	3	8	4	9	7	4.5	3	7	2.5	3	0	6.5	4	5	1	5	4.5	5	3.5
60	5	2.5	6	6	14	5	0	14	0	3	4	0	8	6.5	4	2	9	12	7	5.5	1	1	4.5	7	5	8	5	5	6	14.5	6	8.5	8	8	11	10	4	5	1	3	0	3	6	4	2	4	6	4	4
Total	672.6	760.5	364.5	489.5	597	431	537.5	1032	198	198	125	406	274.5	253	614	440	508	689.5	460	498.5	269.5	223	329	193.5	258.5	236	334	523.5	356	596.5	505.5	420	391.5	543.5	386.5	404	296	376	453	408	198.5	360	348	347.5	322.5	406	287	350.5	281
Phase 1	241	311	138.5	109.5	196	214	176	368	64	99.5	65	267	111	101	239.5	146	148.5	164	119	168	151.5	66	130	64	58	86	108	199	160.5	252.5	214	127	131	120	149.5	171	103.5	106.5	151	128.5	43	155	185.5	112.5	138	172.5	146.5	112	112
phase 2a	262.5	251.5	106.5	219	202.5	99	210	352.5	69	26	23	68.5	73	48	158	179.5	142	261	195.5	192	36	52.5	103	17	74	40	104.5	152.5	58.5	104.5	140.5	113	114	210.5	95	114.5	99.5	142	155.5	150	73	99.5	54	106	102	110	50.5	123.5	82
phase 2b	140.6	175	108	92.5	191.5	94	111	280.5	48	65.5	27.5	36.5	76.5	102	195.5	88.5	191.5	223.5	138.5	135.5	63.5	103.5	88.5	112.5	109	59	112.5	145.5	134	230.5	134	160.5	139	196	127	113	58	104.5	101.5	104	66.5	92.5	104.5	110.5	65.5	108.5	79	84	73.5
phase 2	431.6	449.5	226	380	401	217	361.5	664	134	98.5	60	139	163.5	152	374.5	294	359.5	525.5	341	330.5	118	157	199	129.5	200.5	150	226	324.5	195.5	344	291.5	293	260.5	423.5	237	233	192.5	269.5	302	279.5	155.5	205	162.5	235	184.5	233.5	140.5	238.5	169
[truncated: 7 more columns]

## Sheet: TXB2
	i.p.					Water				Diet
Control	50	75	100	200		0.2	0.35	0.6		82	263	375
111.2	100.1	54.6	31.6	14.8		55.6	38.6	23.4		65.4	46.1	30.8
134.1	84.6	47.8	32.1	13.7		49.8	40.1	19.3		60.7	50.8	34.2
122.4	98.4	50.1	29.8	16.8		52.1	38.7	21.9		70.1	45.6	31.7
119.6	81.2	43.2	28.7	17.6		56.1	37.1	22.6		58.6	43.9	29.7
125.7	87.4	40.2	26.4	15.4		48.7	33.5	19.7		63.2	40.2	33.6
137.4	99.4	39.9	31.4	16.5		49.4	30.4	20.1		72.1	50.4	31.4

## Sheet: von Frey 60% mech. threshold
control				Rt											Lt
	BL1	BL2	BL3	30 min	1h	2h	3h	4h	5h	6h		BL1	BL2	BL3	30 min	1h	2h	3h	4h	5h	6h
1	2	1.4	1	0.4	0.16	0.4	0.6	0.4	1	0.6		1.4	1.4	2	1.4	1.4	2	1.4	1.4	1.4	2
2	1.4	1	1	0.16	0.4	0.16	0.16	0.4	1	0.4		1	1	2	1.4	2	1.4	1.4	1.4	2	4
3	1	2	1	0.16	0.4	0.4	0.6	0.6	0.6	0.4		1.4	2	1	1	1	1	1.4	1	1	1
4	2	1.4	1	0.4	0.6	0.6	0.4	0.6	0.6	1.4		1	1.4	1.4	1	1	1	1.4	1.4	1	2
5	1	1.4	1	0.6	0.6	0.4	1	0.6	1	1.4		1	1.4	1	2	1.4	2	1.4	4	1.4	2
6	1	2	1	0.4	0.16	0.16	0.4	0.4	0.4	0.4		2	2	1	0.6	1.4	1	1	0.6	1	0.6
7	1	1	1	0.16	0.16	0.16	0.16	0.4	0.6	0.6		1.4	1	1	1	1	1	0.6	1	0.6	1
8	1	1	1	0.16	0.16	0.16	0.4	0.4	0.4	1		1	1	1.4	1	1.4	2	1	1	1.4	1
mean	1.3	1.4	1	0.305	0.33	0.305	0.465	0.475	0.7	0.775		1.275	1.4	1.35	1.175	1.325	1.425	1.2	1.475	1.225	1.7
SEM	0.160357	0.146385	0	0.0594919	0.0695906	0.0594919	0.096492	0.0365963	0.092582	0.153239		0.125	0.146385	0.154689	0.148504	0.119149	0.175	0.106904	0.374046	0.148504	0.383592
	1.23333
Non incised (black)				Rt											Lt
	BL1	BL2	BL3	30 min	1h	2h	3h	4h	5h	6h		BL1	BL2	BL3	30 min	1h	2h	3h	4h	5h	6h
1	1.4	1	1	1	1	1	0.6	1	1	1		1	1	1	1	1	1	0.6	1	1	1
2	2	1.4	1.4	2	2	1.4	2	2	2	2		1.4	1	1.4	1.4	2	1.4	1.4	2	4	2
3	1.4	2	1	1	1.4	1	1.4	2	1	2		1	2	1	1	2	1.4	2	2	1	2
4	2	1.4	1	1	1	1	1	1	0.6	1.4		1	1.4	1	1.4	1.4	1.4	1.4	1.4	1	1.4
5	2	1	1	1.4	1.4	1	1	1	1	1.4		2	1.4	1	1	1.4	1	1	1.4	1	1.4
6	2	1	1	1	1.4	1.4	1	1	1	1		1	1	1	1	1	1	1	1	0.6	1
7	1	1	1	1.4	1.4	1.4	2	1.4	1.4	1.4		1	1	1	2	1.4	1.4	1.4	1.4	2	2
8	1	1	1	1	1	1	1	1	1	1		1	1	1	1	1.4	1	1.4	1	1	1
mean	1.6	1.225	1.05	1.225	1.325	1.15	1.25	1.3	1.125	1.4		1.175	1.225	1.05	1.225	1.45	1.2	1.275	1.4	1.45	1.475
SEM	0.160357	0.127825	0.05	0.127825	0.119149	0.0731925	0.180278	0.160357	0.14608	0.146385		0.127825	0.127825	0.05	0.127825	0.13496	0.0755929	0.14608	0.146385	0.390512	0.16448
	1.29167
50 mg/kg IBU				Rt											Lt
	BL1	BL2	BL3	30 min	1h	2h	3h	4h	5h	6h		BL1	BL2	BL3	30 min	1h	2h	3h	4h	5h	6h
1	1	1	1	0.16	0.16	0.16	0.16	0.16	0.4	0.6		1	1	1	1	1	1	1	1	1	1
2	1.4	2	2	0.4	1	1	0.6	1	1.4	2		1.4	2	2	2	2	1.4	2	1.4	2	2
3	1	1	1	0.16	0.4	0.4	1	1	1.4	1		1	1.4	1	1.4	1	1.4	1	1	1.4	1
4	1	1	1	0.16	0.16	0.16	0.16	0.4	1.4	1		1	1	1	1	1.4	1	1	1	1.4	1.4
5	1	1	1	0.16	0.16	0.16	0.6	0.6	1.4	1		2	1	1	1.4	1	1	1.4	1.4	1.4	1.4
6	1	1.4	1	0.16	0.16	0.16	0.16	0.16	0.4	0.6		1	1	1	1	1.4	1	1	1	1.4	1
7	1.4	1.4	2	0.6	1	1.4	1	2	1.4	2		2	2	1.4	2	1.4	1.4	1.4	1.4	2	2
8	2	1.4	1.4	0.6	1.4	1.4	1	2	2	1.4		2	1	1	1.4	1.4	1.4	2	2	2	1.4
mean	1.225	1.275	1.3	0.3	0.555	0.605	0.585	0.915	1.225	1.2		1.425	1.3	1.175	1.4	1.325	1.2	1.35	1.275	1.575	1.4
SEM	0.127825	0.125	0.160357	0.0717137	0.17719	0.200633	0.137516	0.262998	0.19434	0.196396		0.175	0.160357	0.127825	0.146385	0.119149	0.0755929	0.154689	0.125	0.133296	0.146385
	1.26667
75mg/kg IBU				Rt											Lt
	BL1	BL2	BL3	30 min	1h	2h	3h	4h	5h	6h		BL1	BL2	BL3	30 min	1h	2h	3h	4h	5h	6h
1	1	1	1	1	0.6	0.6	0.4	1	1	1.4		1	1	1	1	1	1	1	1.4	1	1.4
2	1	2	1.4	0.6	0.4	0.4	0.4	0.6	0.4	1.4		1	2	1	1.4	1.4	1	1	1.4	1.4	2
3	2	1.4	1.4	0.6	0.6	1	1	1	1	1		1	1.4	1	1	1.4	1	1.4	1.4	1	1.4
4	1	0.6	1	0.4	0.4	0.6	0.6	0.6	1	1.4		1	1	0.6	1	0.6	1	0.6	1	1	1
5	1.4	2	1	0.6	0.6	0.4	0.6	1	1	1		1.4	1	1	1	1	1	1	1	1	1
6	1.4	1	2	0.6	1	1	0.6	1	1.4	1.4		1.4	1	2	1.4	1	1	1	1	1	1.4
7	1.4	2	1.4	0.16	1	1	0.6	1	1	1		2	2	1.4	1.4	1.4	2	1.4	1	1.4	1
8	1	2	2	0.6	0.16	0.6	1	0.6	0.6	1		1.4	2	2	2	2	2	2	1.4	2	2
mean	1.275	1.5	1.4	0.57	0.595	0.7	0.65	0.85	0.925	1.2		1.275	1.425	1.25	1.275	1.225	1.25	1.175	1.2	1.225	1.4
SEM	0.125	0.20354	0.146385	0.0830662	0.102939	0.092582	0.0823754	0.0731925	0.106486	0.0755929		0.125	0.175	0.180278	0.125	0.148504	0.163663	0.148504	0.0755929	0.127825	0.146385
	1.39167
100 mg/kg IBU				Rt											Lt
	BL1	BL2	BL3	30 min	1h	2h	3h	4h	5h	6h		BL1	BL2	BL3	30 min	1h	2h	3h	4h	5h	6h
1	2	2	2	1	1.4	2	1.4	2	1.4	1		2	2	2	2	2	2	2	2	1.4	2
2	2	1	2	1	0.6	2	1	1	1	1		2	1.4	2	1.4	1.4	2	2	2	1.4	1
3	1.4	1.4	1	1.4	1	0.6	1	0.6	1	0.6		2	1.4	1.4	1.4	1	1	1	0.6	1	1
4	1	1	1	0.4	0.4	0.4	0.6	0.4	0.6	0.6		1.4	1	1	1	1	0.6	1	0.6	0.6	0.6
5	1	0.6	0.6	0.6	0.6	0.4	0.6	0.4	0.4	0.4		0.6	0.6	0.6	1	1	0.6	0.6	0.6	0.6	0.6
6	1.4	2	1.4	0.4	1	1	0.6	0.6	1	0.6		1.4	1.4	1	1	1	1	1	0.6	1	1
7	2	2	1	0.16	0.4	1	1	1.4	1	1.4		2	2	1	1	1.4	2	1.4	1.4	2	2
8	1.4	1	1.4	0.4	0.4	0.4	0.6	0.6	0.6	0.6		1.4	1.4	1	1	1	1	1.4	1.4	1.4	1
mean	1.525	1.375	1.3	0.67	0.725	0.975	0.85	0.875	0.875	0.775		1.6	1.4	1.25	1.225	1.225	1.275	1.3	1.15	1.175	1.15
SEM	0.15089	0.197981	0.177281	0.148468	0.130589	0.240349	0.105221	0.199777	0.112995	0.116113		0.177281	0.164751	0.180278	0.127825	0.127825	0.220187	0.177281	0.222807	0.166637	0.195485
	1.4
200 mg/kg IBU				Rt											Lt
	BL1	BL2	BL3	30 min	1h	2h	3h	4h	5h	6h		BL1	BL2	BL3	30 min	1h	2h	3h	4h	5h	6h
1	1	1.4	1	1	0.6	0.4	0.6	1.4	1	1		1.4	1.4	1	2	1.4	1	1	2	1.4	1.4
2	1.4	1	1.4	1	0.6	0.4	1	0.6	1	0.6		1.4	1	1.4	2	2	1	1.4	1	1	1.4
3	1	0.6	1	0.4	0.4	0.4	0.6	0.6	0.6	0.6		1	0.6	1	0.6	0.6	0.6	1	0.6	0.6	0.6
4	1	2	1	1	1	1.4	1.4	0.4	0.6	1		1	2	1	1.4	1	1.4	1.4	1.4	1.4	1
5	2	1	1	0.6	0.6	0.6	1	1	0.6	0.6		0.6	1	1	0.6	1	1	1	1	1	1
6	1	1.4	1.4	0.6	0.6	1	0.6	1	1	1		2	1.4	2	2	1.4	1.4	1.4	1.4	1.4	1.4
7	1	1	1	0.4	0.6	1	0.6	0.6	0.6	0.6		1.4	1	1	1	1	1.4	1.4	1.4	1	1
8	1.4	1	1	0.6	1.4	1	0.6	0.6	1	0.6		1	1	1	1	1	1	1	0.6	1	1
mean	1.225	1.175	1.1	0.7	0.725	0.775	0.8	0.775	0.8	0.75		1.225	1.175	1.175	1.325	1.175	1.1	1.2	1.175	1.1	1.1
SEM	0.127825	0.148504	0.0654654	0.092582	0.112995	0.133296	0.106904	0.116113	0.0755929	0.0731925		0.148504	0.148504	0.127825	0.216918	0.148504	0.1	0.0755929	0.166637	0.1	0.1
				Rt											Lt
0.2 mg/ml IBU	BL1	BL2	BL3	30 min	1h	2h	3h	4h	5h	6h		BL1	BL2	BL3	30 min	1h	2h	3h	4h	5h	6h
1	1	1.4	1	0.4	0.6	1	0.6	1	1	1.4		2	1.4	1.4	1.4	1.4	2	1.4	2	1.4	2
2	1	1	1	0.6	0.4	0.16	0.16	0.4	0.4	0.4		1	0.6	1	1	1	0.6	1	1	1	0.6
3	2	2	2	1	1	1	0.6	1	0.6	0.6		1.4	2	2	2	2	2	2	2	2	2
4	2	1.4	2	0.6	1	1	1.4	1	1.4	1		2	1.4	2	2	2	2	2	2	2	2
5	1.4	2	1.4	0.4	0.6	0.4	0.6	1	0.6	0.6		2	1.4	1	1	1.4	1	1.4	2	1	1.4
6	2	1.4	1.4	0.16	0.16	0.16	0.16	0.16	0.16	0.4		2	1	1	1	0.6	0.6	0.6	0.6	1	0.6
7	1.4	1	1	1	0.6	0.4	0.4	0.6	0.6	0.6		1.4	1	1	1.4	1.4	1	1.4	1	1	1
8	0.6	0.6	0.6	0.16	0.16	0.16	0.16	0.16	0.4	0.4		0.6	0.6	0.6	0.6	0.6	0.6	0.6	0.6	1	0.6
mean	1.425	1.35	1.3	0.54	0.565	0.535	0.51	0.665	0.645	0.675		1.55	1.175	1.25	1.3	1.3	1.225	1.3	1.4	1.3	1.275
SEM	0.190629	0.172171	0.177281	0.116374	0.114751	0.140598	0.146141	0.135844	0.137412	0.125		0.191796	0.166637	0.180278	0.177281	0.192725	0.23433	0.192725	0.232993	0.160357	0.232801
				Rt											Lt
0.35 mg/ml IBU	BL1	BL2	BL3	30 min	1h	2h	3h	4h	5h	6h		BL1	BL2	BL3	30 min	1h	2h	3h	4h	5h	6h
	2	2	2	1.4	1.4	1.4	1.4	1.4	1.4	1		2	2	2	1.4	2	2	2	2	2	2
2	1	1	0.6	0.16	0.16	0.16	0.16	0.16	0.4	0.4		1	1	0.6	0.6	0.6	0.6	0.6	0.6	0.6	0.6
3	0.6	0.6	0.6	0.16	0.16	0.16	0.16	0.16	0.16	0.4		0.6	0.6	0.6	0.6	0.6	0.6	0.6	0.6	1	0.6
4	0.6	1	1	0.6	0.6	0.4	0.16	0.4	0.6	0.6		1	1	1	1	1	1	1	1	1	1
5	1	1.4	1	0.4	1	0.6	0.6	1	0.6	0.6		1	1.4	1	1.4	1.4	1	1.4	1.4	1	1
6	1.4	1.4	1	0.6	0.16	0.6	0.6	0.6	1	0.6		0.6	2	1	1.4	1	2	2	2	1.4	1.4
7	1.4	1	1	1	0.6	1	0.6	1	1	1		1.4	1.4	1	2	1.4	1.4	2	2	1.4	2
8	2	2	2	1	0.6	0.6	0.6	1	1	0.6		2	2	1.4	2	1.4	1.4	2	2	2	1
mean	1.25	1.3	1.15	0.665	0.585	0.615	0.535	0.715	0.77	0.65		1.2	1.425	1.075	1.3	1.175	1.25	1.45	1.45	1.3	1.2
SEM	0.195485	0.177281	0.195485	0.15546	0.156924	0.147926	0.14559	0.160435	0.141573	0.0823754		0.196396	0.190629	0.160078	0.192725	0.166637	0.195485	0.22599	0.22599	0.177281	0.196396
				Rt											Lt
0.6 mg/ml IBU	BL1	BL2	BL3	30 min	1h	2h	3h	4h	5h	6h		BL1	BL2	BL3	30 min	1h	2h	3h	4h	5h	6h
1	1.4	1.4	1	0.4	0.6	0.4	0.6	1	0.6	0.6		1	2	1.4	1	1	1	1.4	1	1.4	1
2	1	0.6	0.6	0.4	0.4	0.16	0.4	0.16	0.4	0.4		0.6	1	0.6	1	0.6	0.6	0.6	0.6	0.6	0.6
3	2	1.4	1	1.4	1.4	2	2	1.4	1.4	1.4		2	1.4	1	2	2	2	2	2	2	2
4	1.4	1.4	1	1	1	0.6	0.4	0.4	0.6	0.4		1	2	1.4	2	2	1.4	1.4	2	2	1
5	1	0.6	0.6	0.4	0.16	0.16	0.16	0.4	0.4	0.16		0.6	0.6	0.6	1	1.4	0.6	0.6	0.6	0.6	0.6
6	1	0.6	1	0.6	0.6	0.6	0.6	0.6	0.6	0.6		1.4	1	1	1	0.6	1	1.4	1.4	1	1
7	1	1.4	1	0.16	0.16	0.4	0.4	0.4	0.4	0.4		1	1	0.6	1	1	1	0.6	1	0.6	1
8	1.4	1	1.4	1	1	0.6	1.4	1.4	1.4	0.6		2	1	1	1.4	1	2	2	2	1.4	1.4
mean	1.275	1.05	0.95	0.67	0.665	0.615	0.745	0.72	0.725	0.57		1.2	1.25	0.95	1.3	1.2	1.2	1.25	1.325	1.2	1.075
SEM	0.125	0.140153	0.0906327	0.148468	0.15546	0.208112	0.221416	0.171047	0.15089	0.13		0.196396	0.180278	0.118019	0.160357	0.196396	0.196396	0.209591	0.216918	0.210442	0.160078
				Rt											Lt
82 mg/kg diet	BL1	BL2	BL3	30 min	1h	2h	3h	4h	5h	6h		BL1	BL2	BL3	30 min	1h	2h	3h	4h	5h	6h
1	2	1.4	1.4	1	1	1	0.6	1	0.4	1		2	1	1	2	2	1.4	2	1.4	2	1.4
2	1	1	1	0.4	0.16	0.6	0.4	0.16	0.4	0.4		1	1	1	1	1	1.4	1.4	1.4	1.4	1.4
3	0.6	0.6	1	0.6	0.16	0.16	0.16	0.16	0.16	0.4		0.6	0.6	1	0.6	0.6	0.6	0.6	0.6	1	0.6
4	1	1	1	0.4	0.6	0.6	0.4	0.4	0.6	0.6		1	1	1	1	1	1	1	0.6	1	1
5	1.4	2	2	0.16	0.4	0.16	0.6	0.6	0.6	1		2	2	2	2	1.4	2	1	1.4	1.4	1.4
6	1	0.6	1	0.4	0.16	0.16	0.16	0.16	0.4	0.4		1	0.6	0.6	1	1	0.6	0.6	0.6	0.6	0.6
7	2	2	2	0.6	1	1	0.4	1	0.6	0.6		2	2	2	2	2	2	2	1.4	2	1.4
8	0.6	1	1	0.16	0.4	0.4	0.16	0.16	0.4	0.4		0.6	1	1	1	0.6	1	1	0.6	1	1
mean	1.2	1.2	1.3	0.465	0.485	0.51	0.36	0.455	0.445	0.6		1.275	1.15	1.2	1.325	1.2	1.25	1.2	1	1.3	1.1
SEM	0.196396	0.196396	0.160357	0.096492	0.125	0.125071	0.0654654	0.131353	0.0536856	0.092582		0.220187	0.195485	0.181265	0.203321	0.196396	0.195485	0.196396	0.151186	0.177281	0.125357
				Rt											Lt
375 mg/kg diet	BL1	BL2	BL3	30 min	1h	2h	3h	4h	5h	6h		BL1	BL2	BL3	30 min	1h	2h	3h	4h	5h	6h
1	1	1	1.4	0.6	0.4	0.6	0.4	0.4	0.4	0.6		1	2	1.4	1	1.4	1	1	1.4	1	1
2	1.4	2	2	0.6	1.4	1	0.6	1	1	1.4		2	2	2	2	2	2	2	2	2	2
3	1	1.4	2	1	1	1	1	1.4	0.6	1.4		1	1	1.4	1	1	1	1	1	1	1.4
4	1.4	1	1.4	0.4	1	0.6	0.6	0.6	0.6	0.4		1	1	1	1	1	1	1.4	1	1.4	1.4
5	2	1	1	0.4	0.6	0.4	0.6	0.6	0.6	0.4		2	1.4	2	2	2	1	2	1	2	1.4
6	1	0.6	0.6	0.6	0.4	0.4	0.4	0.4	0.6	0.4		0.6	0.6	0.6	0.6	0.6	0.6	0.6	0.6	1	0.6
7	1	1.4	1.4	0.6	0.4	0.6	0.6	0.6	0.6	0.6		1.4	1.4	1.4	2	1	1.4	1.4	1.4	1.4	1
8	1	1	2	0.4	0.6	0.4	0.4	0.4	0.4	0.6		1	1	1.4	1.4	1.4	1	1	1	1	1
mean	1.225	1.175	1.475	0.575	0.725	0.625	0.575	0.675	0.6	0.725		1.25	1.3	1.4	1.375	1.3	1.125	1.3	1.175	1.35	1.225
SEM	0.127825	0.148504	0.181019	0.0700765	0.130589	0.0881354	0.0700765	0.125	0.0654654	0.15089		0.180278	0.177281	0.164751	0.197981	0.177281	0.14608	0.177281	0.148504	0.154689	0.148504
				Rt											Lt
263 mg/kg diet	BL1	BL2	BL3	30 min	1h	2h	3h	4h	5h	6h		BL1	BL2	BL3	30 min	1h	2h	3h	4h	5h	6h
1	1.4	1	1	0.4	0.4	0.4	0.4	0.4	0.6	0.4		1.4	1.4	1	1	1	1	1	1	1	1
2	1	2	2	1	1	1.4	1	0.6	1	1		1.4	2	2	2	2	2	1.4	2	2	2
3	1.4	1.4	1	0.16	0.16	0.16	0.4	0.4	0.4	0.16		1	1.4	1	0.6	1	1	1	1	1	1
4	0.6	1	0.6	0.16	0.16	0.16	0.16	0.16	0.16	0.4		1	0.6	0.6	0.6	0.6	0.6	0.6	0.6	0.6	1
5	1	1	1	0.4	0.6	0.16	0.4	0.4	0.4	0.4		1	1	1	1	1	1	1	1	1	1
6	1.4	1	1.4	0.6	0.4	0.16	0.16	0.4	1	0.4		1.4	1	1	1	1	0.6	1	1	1	1
7	2	2	1.4	1.4	1	1	1	1	1	1		2	2	2	2	2	2	2	2	2	2
8	1	1	1	0.6	0.6	0.6	0.4	0.4	0.6	0.6		1.4	1	1	1	2	1.4	1.4	1	1.4	1.4
mean	1.225	1.3	1.175	0.59	0.54	0.505	0.49	0.47	0.645	0.545		1.325	1.3	1.2	1.15	1.325	1.2	1.175	1.2	1.25	1.3
SEM	0.148504	0.160357	0.148504	0.15038	0.116374	0.16595	0.117291	0.0864374	0.114751	0.107687		0.119149	0.177281	0.181265	0.195485	0.203321	0.196396	0.148504	0.181265	0.180278	0.160357

## Sheet: vF difference between Rt & Lt
incised	BL1	BL2	BL3	30 min	1h	2h	3h	4h	5h	6h
1	-0.6	0	1	1	1.24	1.6	0.8	1	0.4	1.4
2	-0.4	0	1	1.24	1.6	1.24	1.24	1	1	3.6
3	0.4	0	0	0.84	0.6	0.6	0.8	0.4	0.4	0.6
4	-1	0	0.4	0.6	0.4	0.4	1	0.8	0.4	0.6
5	0	0	0	1.4	0.8	1.6	0.4	3.4	0.4	0.6
6	1	0	0	0.2	1.24	0.84	0.6	0.2	0.6	0.2
7	0.4	0	0	0.84	0.84	0.84	0.44	0.6	0	0.4
8	0	0	0.4	0.84	1.24	1.84	0.6	0.6	1	0
mean	-0.025	0	0.35	0.87	0.995	1.12	0.735	1	0.525	0.925
SEM	0.225	0	0.154689	0.130876	0.141308	0.186088	0.100836	0.356571	0.119149	0.408722
Naieve
1	-0.4	0	0	0	0	0	0	0	0	0
2	-0.6	-0.4	0	-0.6	0	0	-0.6	0	2	0
3	-0.4	0	0	0	0.6	0.4	0.6	0	0	0
4	-1	0	0	0.4	0.4	0.4	0.4	0.4	0.4	0
5	0	0.4	0	-0.4	0	0	0	0.4	0	0
6	-1	0	0	0	-0.4	-0.4	0	0	-0.4	0
7	0	0	0	0.6	0	0	-0.6	0	0.6	0.6
8	0	0	0	0	0.4	0	0.4	0	0	0
mean	-0.425	0	0	0	0.125	0.05	0.025	0.1	0.325	0.075
SEM	0.148504	0.0755929	0	0.136277	0.112995	0.0906327	0.157831	0.0654654	0.261691	0.075
50 mg/kg IBU
1	0	0	0	0.84	0.84	0.84	0.84	0.84	0.6	0.4
2	0	0	0	1.6	1	0.4	1.4	0.4	0.6	0
3	0	0.4	0	1.24	0.6	1	0	0	0	0
4	0	0	0	0.84	1.24	0.84	0.84	0.6	0	0.4
5	1	0	0	1.24	0.84	0.84	0.8	0.8	0	0.4
6	0	-0.4	0	0.84	1.24	0.84	0.84	0.84	1	0.4
7	0.6	0.6	-0.6	1.4	0.4	0	0.4	-0.6	0.6	0
8	0	-0.4	-0.4	0.8	0	0	1	0	0	0
mean	0.2	0.025	-0.125	1.1	0.77	0.595	0.765	0.36	0.35	0.2
SEM	0.136277	0.122109	0.0839855	0.109545	0.15019	0.143315	0.14608	0.183925	0.140153	0.0755929
75mg/kg IBU
	BL1	BL2	BL3	30 min	1h	2h	3h	4h	5h	6h
1	0	0	0	0	0.4	0.4	0.6	0.4	0	0
2	0	0	-0.4	0.8	1	0.6	0.6	0.8	1	0.6
3	-1	0	-0.4	0.4	0.8	0	0.4	0.4	0	0.4
4	0	0.4	-0.4	0.6	0.2	0.4	0	0.4	0	-0.4
5	0	-1	0	0.4	0.4	0.6	0.4	0	0	0
6	0	0	0	0.8	0	0	0.4	0	-0.4	0
7	0.6	0	0	1.24	0.4	1	0.8	0	0.4	0
8	0.4	0	0	1.4	1.84	1.4	1	0.8	1.4	1
mean	0	-0.075	-0.15	0.705	0.63	0.55	0.525	0.35	0.3	0.2
SEM	0.164751	0.141105	0.0731925	0.162646	0.205739	0.167971	0.106486	0.118019	0.213809	0.155839
100 mg/kg IBU
	BL1	BL2	BL3	30 min	1h	2h	3h	4h	5h	6h
1	0	0	0	1	0.6	0	0.6	0	0	1
2	0	0.4	0	0.4	0.8	0	1	1	0.4	0
3	0.6	0	0.4	0	0	0.4	0	0	0	0.4
4	0.4	0	0	0.6	0.6	0.2	0.4	0.2	0	0
5	-0.4	0	0	0.4	0.4	0.2	0	0.2	0.2	0.2
6	0	-0.6	-0.4	0.6	0	0	0.4	0	0	0.4
7	0	0	0	0.84	1	1	0.4	0	1	0.6
8	0	0.4	-0.4	0.6	0.6	0.6	0.8	0.8	0.8	0.4
mean	0.075	0.025	-0.05	0.555	0.5	0.3	0.45	0.275	0.3	0.375
SEM	0.106486	0.109789	0.0906327	0.107021	0.125357	0.125357	0.123924	0.141105	0.141421	0.116113
200 mg/kg IBU
	BL1	BL2	BL3	30 min	1h	2h	3h	4h	5h	6h
1	0.4	0	0	1	0.8	0.6	0.4	0.6	0.4	0.4
2	0	0	0	1	1.4	0.6	0.4	0.4	0	0.8
3	0	0	0	0.2	0.2	0.2	0.4	0	0	0
4	0	0	0	0.4	0	0	0	1	0.8	0
5	-1.4	0	0	0	0.4	0.4	0	0	0.4	0.4
6	1	0	0.6	1.4	0.8	0.4	0.8	0.4	0.4	0.4
7	0.4	0	0	0.6	0.4	0.4	0.8	0.8	0.4	0.4
8	-0.4	0	0	0.4	-0.4	0	0.4	0	0	0.4
mean	0	0	0.075	0.625	0.45	0.325	0.4	0.4	0.3	0.35
SEM	0.247848	0	0.075	0.166637	0.195485	0.0839855	0.106904	0.136277	0.1	0.0906327
0.2 mg/kg	BL1	BL2	BL3	30 min	1h	2h	3h	4h	5h	6h
1	1	0	0.4	1	0.8	1	0.8	1	0.4	0.6
2	0	-0.4	0	0.4	0.6	0.44	0.84	0.6	0.6	0.2
3	-0.6	0	0	1	1	1	1.4	1	1.4	1.4
4	0	0	0	1.4	1	1	0.6	1	0.6	1
5	0.6	-0.6	-0.4	0.6	0.8	0.6	0.8	1	0.4	0.8
6	0	-0.4	-0.4	0.84	0.44	0.44	0.44	0.44	0.84	0.2
7	0	0	0	0.4	0.8	0.6	1	0.4	0.4	0.4
8	0	0	0	0.44	0.44	0.44	0.44	0.44	0.6	0.2
mean	0.125	-0.175	-0.05	0.76	0.735	0.69	0.79	0.735	0.655	0.6
SEM	0.168767	0.0881354	0.0906327	0.128062	0.0785357	0.0937321	0.111803	0.102243	0.119029	0.155839
0.35 mg/kg	BL1	BL2	BL3	30 min	1h	2h	3h	4h	5h	6h
1	0	0	0	0	0.6	0.6	0.6	0.6	0.6	1
2	0	0	0	0.44	0.44	0.44	0.44	0.44	0.2	0.2
3	0	0	0	0.44	0.44	0.44	0.44	0.44	0.84	0.2
4	0.4	0	0	0.4	0.4	0.6	0.84	0.6	0.4	0.4
5	0	0	0	1	0.4	0.4	0.8	0.4	0.4	0.4
6	-0.8	0.6	0	0.8	0.84	1.4	1.4	1.4	0.4	0.8
7	0	0.4	0	1	0.8	0.4	1.4	1	0.4	1
8	0	0	-0.6	1	0.8	0.8	1.4	1	1	0.4
mean	-0.05	0.125	-0.075	0.635	0.59	0.635	0.915	0.735	0.53	0.55
SEM	0.118019	0.0839855	0.075	0.131026	0.0691789	0.119627	0.15089	0.127153	0.0943398	0.118019
0.6 mg/kg	BL1	BL2	BL3	30 min	1h	2h	3h	4h	5h	6h
1	-0.4	0.6	0.4	0.6	0.4	0.6	0.8	0	0.8	0.4
2	-0.4	0.4	0	0.6	0.2	0.44	0.2	0.44	0.2	0.2
3	0	0	0	0.6	0.6	0	0	0.6	0.6	0.6
4	-0.4	0.6	0.4	1	1	0.8	1	1.6	1.4	0.6
5	-0.4	0	0	0.6	1.24	0.44	0.44	0.2	0.2	0.44
6	0.4	0.4	0	0.4	0	0.4	0.8	0.8	0.4	0.4
7	0	-0.4	-0.4	0.84	0.84	0.6	0.2	0.6	0.2	0.6
8	0.6	0	-0.4	0.4	0	1.4	0.6	0.6	0	0.8
mean	-0.075	0.2	0	0.63	0.535	0.585	0.505	0.605	0.475	0.505
SEM	0.141105	0.125357	0.106904	0.0720119	0.164393	0.142014	0.124886	0.168258	0.160078	0.0645589
82 mg/kg diet	BL1	BL2	BL3	30 min	1h	2h	3h	4h	5h	6h
1	0	-0.4	-0.4	1	1	0.4	1.4	0.4	1.6	0.4
2	0	0	0	0.6	0.84	0.8	1	1.24	1	1
3	0	0	0	0	0.44	0.44	0.44	0.44	0.84	0.2
4	0	0	0	0.6	0.4	0.4	0.6	0.2	0.4	0.4
5	0.6	0	0	1.84	1	1.84	0.4	0.8	0.8	0.4
6	0	0	-0.4	0.6	0.84	0.44	0.44	0.44	0.2	0.2
7	0	0	0	1.4	1	1	1.6	0.4	1.4	0.8
8	0	0	0	0.84	0.2	0.6	0.84	0.44	0.6	0.6
mean	0.075	-0.05	-0.1	0.86	0.715	0.74	0.84	0.545	0.855	0.5
SEM	0.075	0.05	0.0654654	0.198854	0.112995	0.174847	0.163007	0.115124	0.167833	0.1
263 mg/kg diet	BL1	BL2	BL3	30 min	1h	2h	3h	4h	5h	6h
1	0	0.4	0	0.6	0.6	0.6	0.6	0.6	0.4	0.6
2	0.4	0	0	1	1	0.6	0.4	1.4	1	1
3	-0.4	0	0	0.44	0.84	0.84	0.6	0.6	0.6	0.84
4	0.4	-0.4	0	0.44	0.44	0.44	0.44	0.44	0.44	0.6
5	0	0	0	0.6	0.4	0.84	0.6	0.6	0.6	0.6
6	0	0	-0.4	0.4	0.6	0.44	0.84	0.6	0	0.6
7	0	0	0.6	0.6	1	1	1	1	1	1
8	0.4	0	0	0.4	1.4	0.8	1	0.6	0.8	0.8
mean	0.1	-1.38778e-17	0.025	0.56	0.785	0.695	0.685	0.73	0.605	0.755
SEM	0.1	0.0755929	0.095898	0.0705084	0.120223	0.0724815	0.0829587	0.111034	0.118427	0.0634429
375 mg/kg diet	BL1	BL2	BL3	30 min	1h	2h	3h	4h	5h	6h
1	0	1	0	0.4	1	0.4	0.6	1	0.6	0.4
2	0.6	0	0	1.4	0.6	1	1.4	1	1	0.6
3	0	-0.4	-0.6	0	0	0	0	-0.4	0.4	0
4	-0.4	0	-0.4	0.6	0	0.4	0.8	0.4	0.8	1
5	0	0.4	1	1.6	1.4	0.6	1.4	0.4	1.4	1
6	-0.4	0	0	0	0.2	0.2	0.2	0.2	0.4	0.2
7	0.4	0	0	1.4	0.6	0.8	0.8	0.8	0.8	0.4
8	0	0	-0.6	1	0.8	0.6	0.6	0.6	0.6	0.4
mean	0.025	0.125	-0.075	0.8	0.575	0.5	0.725	0.5	0.75	0.5
SEM	0.122109	0.14608	0.181019	0.226779	0.175	0.113389	0.177029	0.164751	0.118019	0.125357
